# Supplementary material
Source: PubMed Central journal article supplement (PMC4213659)
Supplement: rspb20142210supp1.pdf [file rspb20142210supp1.pdf]

## Electronic Supplementary Material

### *Supplementary methods*

The abundance of amphipods at each bait type was quantified using a custom macro in image J to assess the area of biological material (i.e. near white colour) compared to the area of the bait plate (i.e. near black colour). The macro automatically performed a number of identical actions for each image. It 1) cropped the images from each deployment so only the black bait plate was visible (the extent of the crop was determined separately for each deployment), 2) converted the image into a grey-scale image, 3) applied a threshold to the image (grey-scale 0 – 60 of 256 was found iteratively to best represent biological material), 4) converted this to a mask and then, 5) returned the percentage of the bait plate that met the threshold criteria for each image. This resulted in a single ‘white area’ number for each image.

The ‘white area’ ( $White\ area_{total}$ ) comprised the area of the fauna of interest ( $white\ area_{scavengers}$ ), the bait ( $white\ area_{bait}$ ) and any white marks on the bait plate (see figures 3a – d). For each deployment two ‘standard’ frames were identified for each deployment: S1) fully-baited bait plate with no organisms, taken just before the lander arrived at the seafloor, S2) bait plate after bait had been eaten and cleared of all organisms, taken just after the lander had started to ascend from the seabed. The ‘white area’ for each of these was determined. The difference in white area resulting from the bait was determined by subtraction ( $white\ area_{bait} = S1 - S2$ ). The last time when the bait was visible ( $time_{bait\ gone}$ ) was recorded from the photographs for each deployment. A linear bait consumption rate was assumed between the time of arrival at the seafloor and  $time_{bait\ gone}$ . The white area of everything excluding scavengers ( $white\ area_{excluding\ scavengers}$ ) was set as S1 at time 0. The  $white\ area_{excluding\ scavengers}$  then declined linearly from S1 to reach S2 at  $time_{bait\ gone}$  and then remained at S2 until the end of the deployment. The  $white\ area_{excluding\ scavengers}$  was subtracted from  $White\ area_{total}$  to

give *White area*<sub>scavengers</sub>. At this stage, the *White area*<sub>scavengers</sub> was converted to an absolute area by multiplying the percentage area by the measured area of the bait plate visible in the analysed frames.

Biological material that contributed to the *White area*<sub>scavengers</sub> included all the scavenging organisms. To determine the white area from the amphipods (*white area*<sub>amp</sub>), a simple model was developed to estimate the contribution of the 3 other major taxa (*M. glutinosa*, *M. tenuimana* and decapod shrimp):

$$\text{White area}_{\text{scavengers}} = (N_{\text{mg}} * A_{\text{mg}}) + (N_{\text{mt}} * A_{\text{mt}}) + (N_{\text{ds}} * A_{\text{ds}}) + \text{white area}_{\text{amp}}$$

Where N refers to the abundance, and A the average area for each taxon (measured manually in image J using 30 randomly selected individuals for each taxon). Subscripts relate to the taxon: *M. glutinosa* (mg), *M. tenuimana* (mt), decapod shrimp (ds) and amphipods (amp). This equation was rearranged to calculate *white area*<sub>amp</sub>.

To calculate the number of amphipods present from *white area*<sub>amp</sub>, manual amphipod counts were made from 3 randomly chosen frames for each deployment as well as the frame with the visually estimated maximal number of amphipods, the frame with the highest *white area*<sub>amp</sub> and frames with no amphipods. The *white area*<sub>amp</sub> was normalised (to between 0 and 1) and smoothed with a running average (span = 20) to remove outlying observations. In periods where no amphipods were observed the normalised *white area*<sub>amp</sub> was set to zero. A linear regression model (with 0 intercept) was applied to these data (separately for each deployment) to determine the coefficients that link the area of white for each image and the number of amphipods. The linear model coefficients were applied to the *white area*<sub>amp</sub> to provide an estimate of  $N_{\text{amp}}$ . The model coefficients are shown in table S1 (see electronic supplementary material). The linear regression models were a good fit to the data for all deployments ( $R^2 >$

0.6). The mean number of amphipods at each bait over time was plotted in R with polygons representing 95% confidence limits of all estimated values ( $n = 4$  for each bait type, except for the *C. capillata* bait where  $n = 2$ ). The number of amphipods was adjusted prior to plotting by converting all the numbers prior to the frame where the first amphipod appeared (assessed manually; see electronic supplementary material, table S2) to zero.

### ***Supplementary movies***

The movie files are available at Dryad (<http://datadryad.org/>): doi:10.5061/dryad.90kt3.

The legends for the four MP4 files are below.

Movie S1. Compressed time-lapse movie of the scavenger response to *S. scombrus* bait at a water depth of 1250m in the Sognefjorden. All photographs were taken over 18 hours, and the time between each photograph is 2.5 minutes.

Movie S2. Compressed time-lapse movie of the scavenger response to *P. periphylla* (thawed) bait at a water depth of 1250m in the Sognefjorden. All photographs were taken over 18 hours, and the time between each photograph is 2.5 minutes.

Movie S3. Compressed time-lapse movie of the scavenger response to *P. periphylla* (fresh) bait at a water depth of 1250m in the Sognefjorden. All photographs were taken over 18 hours, and the time between each photograph is 2.5 minutes.

Movie S4. Compressed time-lapse movie of the scavenger response to *C. capillata* bait at a water depth of 1250m in the Sognefjorden. All photographs were taken over 18 hours, and the time between each photograph is 2.5 minutes.

*Supplementary figure*

Figure S1. Lander deployment stations (numbered) in the Sognefjorden, Norway. The different symbols situated along the fjord refer to the different lander treatments in the deployments inset.

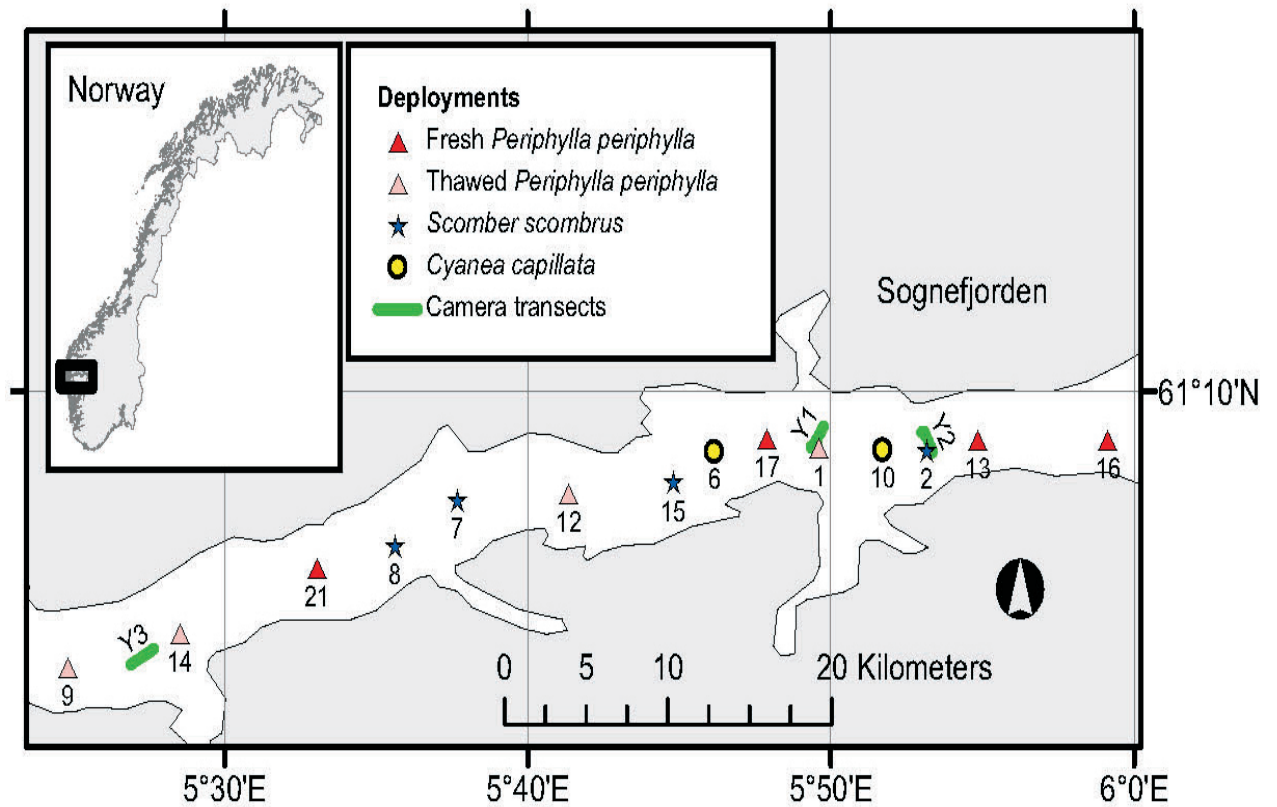

### Supplementary tables

Table S1: Model coefficients for the relationship between white area and manual counts of amphipod abundances for analysed deployments.

| deployment | bait                             | slope    | r <sup>2</sup> | p-value |
|------------|----------------------------------|----------|----------------|---------|
| 3          | <i>P. periphylla</i><br>(thawed) | 1373.193 | 0.90           | 0.049   |
| 4          | <i>S. scombrus</i>               | 2148.104 | 0.95           | 0.024   |
| 5          | <i>S. scombrus</i>               | 1598.343 | 0.96           | 0.019   |
| 6          | <i>P. periphylla</i><br>(thawed) | 4428.231 | 0.98           | 0.011   |
| 7          | <i>P. periphylla</i><br>(thawed) | 1204.292 | 0.96           | 0.004   |
| 8          | <i>S. scombrus</i>               | 861.7134 | 0.63           | 0.060   |
| 9          | <i>S. scombrus</i>               | 1829.819 | 0.77           | 0.021   |
| 10         | <i>P. periphylla</i><br>(thawed) | 1093.272 | 0.87           | 0.068   |
| 11         | <i>C. capillata</i>              | 2114.481 | 0.99           | 0.003   |
| 12         | <i>C. capillata</i>              | 1136.464 | 0.90           | 0.051   |
| 13         | <i>P. periphylla</i><br>(fresh)  | 328.6126 | 0.70           | 0.018   |
| 14         | <i>P. periphylla</i><br>(fresh)  | 1874.58  | 0.99           | 0.001   |
| 15         | <i>P. periphylla</i><br>(fresh)  | 745.0737 | 0.89           | 0.005   |
| 16         | <i>P. periphylla</i><br>(fresh)  | 1598.59  | 0.84           | 0.003   |

Table S2: Manual measurement of the time when the first amphipod appeared at the bait plate

| deployment | bait                             | frame with first arrival | time of first amphipod arrival (mins.) |
|------------|----------------------------------|--------------------------|----------------------------------------|
| 3          | <i>P. periphylla</i><br>(thawed) | DSC_0878.JPG             | 52.5                                   |
| 6          | <i>P. periphylla</i><br>(thawed) | DSC_0843.JPG             | 27.5                                   |
| 7          | <i>P. periphylla</i><br>(thawed) | DSC_0035.JPG             | 27.5                                   |
| 10         | <i>P. periphylla</i><br>(thawed) | DSC_0833.JPG             | 42.5                                   |
| 4          | <i>S. scombrus</i>               | DSC_0318.JPG             | 37.5                                   |
| 5          | <i>S. scombrus</i>               | DSC_0032.JPG             | 25                                     |
| 8          | <i>S. scombrus</i>               | DSC_0356.JPG             | 37.5                                   |
| 9          | <i>S. scombrus</i>               | DSC_0034.JPG             | 12.5                                   |
| 13         | <i>P. periphylla</i><br>(fresh)  | DSC_0895.JPG             | 30                                     |
| 14         | <i>P. periphylla</i><br>(fresh)  | DSC_0025.JPG             | 15                                     |
| 15         | <i>P. periphylla</i><br>(fresh)  | DSC_0474.JPG             | 47.5                                   |
| 16         | <i>P. periphylla</i><br>(fresh)  | DSC_0030.JPG             | 30                                     |
| 11         | <i>C. capillata</i>              | DSC_0316.JPG             | 17.5                                   |
| 12         | <i>C. capillata</i>              | DSC_0032.JPG             | 25                                     |

Table S3. Statistical results for tests assessing differences in the maximum number of scavengers and the time of maximum abundance at the different baits. NS denotes non-significance ( $p > 0.05$ ).

| scavenger                    | test                | maximum number           |      |                 | <i>p</i> -values from multiple comparison tests |                                                              |                              |                               |
|------------------------------|---------------------|--------------------------|------|-----------------|-------------------------------------------------|--------------------------------------------------------------|------------------------------|-------------------------------|
|                              |                     | LR Chi-squared           | df   | <i>p</i> -value | scavenger                                       | bait                                                         | <i>P. periphylla</i> (fresh) | <i>P. periphylla</i> (thawed) |
| <i>M. glutinosa</i>          | GLM (quasi-Poisson) | 48.467                   | 2    | <0.0001         | <i>M. glutinosa</i>                             | <i>P. periphylla</i> (thawed)<br><i>S. scombrus</i> (thawed) | <0.01<br><0.0001             | <0.001                        |
| <i>M. tenuimana</i>          | GLM (Poisson)       | 8.845                    | 2    | 0.012           | <i>M. Tenuimana</i>                             | <i>P. periphylla</i> (thawed)<br><i>S. scombrus</i> (thawed) | NS<br><0.01                  | NS                            |
| Unidentified decapod shrimp  | GLM (quasi-Poisson) | 9.509                    | 2    | 0.009           | Unidentified decapod shrimp                     | <i>P. periphylla</i> (thawed)<br><i>S. scombrus</i> (thawed) | NS<br><0.05                  | <0.01                         |
| <i>O. obtusa</i>             | ANOVA               | <i>f</i> -value<br>0.538 | 2, 9 | 0.602           |                                                 |                                                              |                              |                               |
| time of maximum number (hrs) |                     |                          |      |                 |                                                 |                                                              |                              |                               |
|                              |                     | <i>f</i> -value          | df   | <i>p</i> -value |                                                 |                                                              |                              |                               |
| <i>M. glutinosa</i>          | ANOVA               | 0.95                     | 2, 9 | 0.422           |                                                 |                                                              |                              |                               |
| <i>M. tenuimana</i>          | Kruskal-Wallis      | Chi-squared<br>0.154     | 2    | 0.926           |                                                 |                                                              |                              |                               |
| <i>O. obtusa</i>             | Kruskal-Wallis      | 2.731                    | 2    | 0.255           |                                                 |                                                              |                              |                               |
| Unidentified decapod shrimp  | Kruskal-Wallis      | 4.468                    | 2    | 0.107           |                                                 |                                                              |                              |                               |
